# Supplementary material for: Yiqi Fumai Injection as an Adjuvant Therapy in Treating Chronic Heart Failure: A Meta-Analysis of 33 Randomized Controlled Trials
Source: PubMed Central journal article supplement (PMC7453275; doi:10.1155/2020/1876080), 2020-08-19
Supplement: 1876080.f1.pdf [file 1876080.f1.pdf]

## **Supplementary files**

Figures S1-S2: Results of the risk of bias assessment.

Figures S3-S5: Funnel plots.

Table S1-S3: Results of the subgroup analyses.

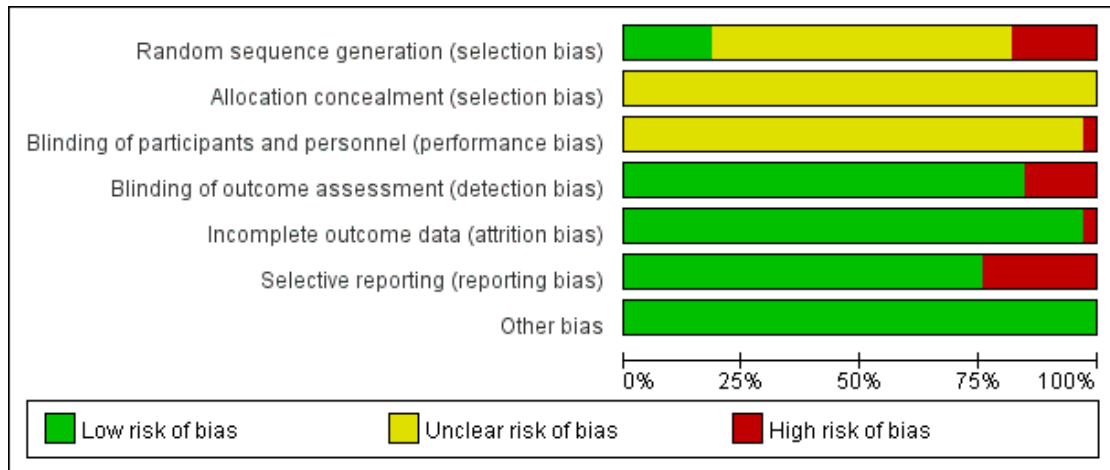

Figure S1. Percentage of the risk of bias

|            | Random sequence generation (selection bias) | Allocation concealment (selection bias) | Blinding of participants and personnel (performance bias) | Blinding of outcome assessment (detection bias) | Incomplete outcome data (attrition bias) | Selective reporting (reporting bias) | Other bias |
|------------|---------------------------------------------|-----------------------------------------|-----------------------------------------------------------|-------------------------------------------------|------------------------------------------|--------------------------------------|------------|
| Aunt 2017  | +                                           | ?                                       | ?                                                         | +                                               | +                                        | -                                    | +          |
| Diao 2018  | ?                                           | ?                                       | ?                                                         | +                                               | +                                        | +                                    | +          |
| Dong 2017  | ?                                           | ?                                       | ?                                                         | +                                               | +                                        | +                                    | +          |
| Feng 2013  | ?                                           | ?                                       | ?                                                         | +                                               | +                                        | +                                    | +          |
| Li 2016    | ?                                           | ?                                       | ?                                                         | +                                               | +                                        | -                                    | +          |
| Li 2019    | +                                           | ?                                       | ?                                                         | +                                               | +                                        | +                                    | +          |
| Li C 2015  | ?                                           | ?                                       | ?                                                         | -                                               | +                                        | -                                    | +          |
| Li J 2015  | +                                           | ?                                       | ?                                                         | -                                               | +                                        | +                                    | +          |
| Liu 2017   | +                                           | ?                                       | ?                                                         | +                                               | +                                        | +                                    | +          |
| Ly 2017    | +                                           | ?                                       | ?                                                         | +                                               | +                                        | +                                    | +          |
| Mao 2018   | ?                                           | ?                                       | ?                                                         | +                                               | +                                        | +                                    | +          |
| Ren 2016   | ?                                           | ?                                       | ?                                                         | +                                               | +                                        | -                                    | +          |
| Sun 2015   | ?                                           | ?                                       | ?                                                         | +                                               | +                                        | +                                    | +          |
| Sun 2016   | ?                                           | ?                                       | ?                                                         | -                                               | +                                        | +                                    | +          |
| Wang 2013  | ?                                           | ?                                       | ?                                                         | +                                               | +                                        | +                                    | +          |
| Wang 2014  | ?                                           | ?                                       | ?                                                         | +                                               | +                                        | +                                    | +          |
| Wang 2016  | ?                                           | ?                                       | ?                                                         | +                                               | +                                        | +                                    | +          |
| Wang 2018  | ?                                           | ?                                       | ?                                                         | +                                               | +                                        | +                                    | +          |
| Wang 2019  | +                                           | ?                                       | ?                                                         | +                                               | +                                        | +                                    | +          |
| Wu 2012    | ?                                           | ?                                       | ?                                                         | +                                               | +                                        | +                                    | +          |
| Xi 2015    | ?                                           | ?                                       | ?                                                         | -                                               | +                                        | -                                    | +          |
| Xue 2014   | +                                           | ?                                       | ?                                                         | +                                               | -                                        | +                                    | +          |
| Yang 2012  | +                                           | ?                                       | ?                                                         | +                                               | +                                        | +                                    | +          |
| Yang 2014  | ?                                           | ?                                       | -                                                         | +                                               | +                                        | +                                    | +          |
| Yang 2016  | ?                                           | ?                                       | ?                                                         | +                                               | +                                        | -                                    | +          |
| Yang 2017  | +                                           | ?                                       | ?                                                         | +                                               | +                                        | +                                    | +          |
| Yu 2012    | ?                                           | ?                                       | ?                                                         | +                                               | +                                        | +                                    | +          |
| Yu 2015    | +                                           | ?                                       | ?                                                         | +                                               | +                                        | +                                    | +          |
| Zhai 2011  | +                                           | ?                                       | ?                                                         | -                                               | +                                        | -                                    | +          |
| Zhang 2014 | ?                                           | ?                                       | ?                                                         | +                                               | +                                        | -                                    | +          |
| Zhang 2015 | +                                           | ?                                       | ?                                                         | +                                               | +                                        | +                                    | +          |
| Zhu 2014   | ?                                           | ?                                       | ?                                                         | +                                               | +                                        | +                                    | +          |
| Zhu 2019   | ?                                           | ?                                       | ?                                                         | +                                               | +                                        | +                                    | +          |

Figure S2. Risk of bias assessment of the included studies.

Note: "+" indicates low, "-" indicates high, and "?" indicates an unclear risk of bias.

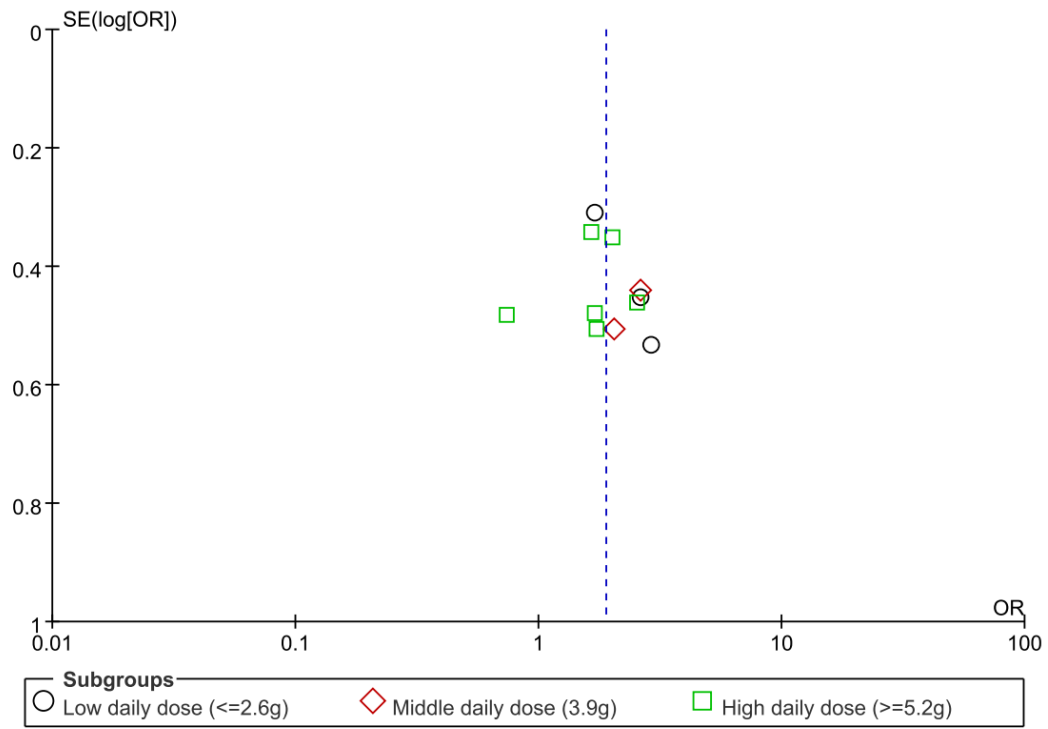

Figure S3. Publication bias funnel plots of the response to treatment.

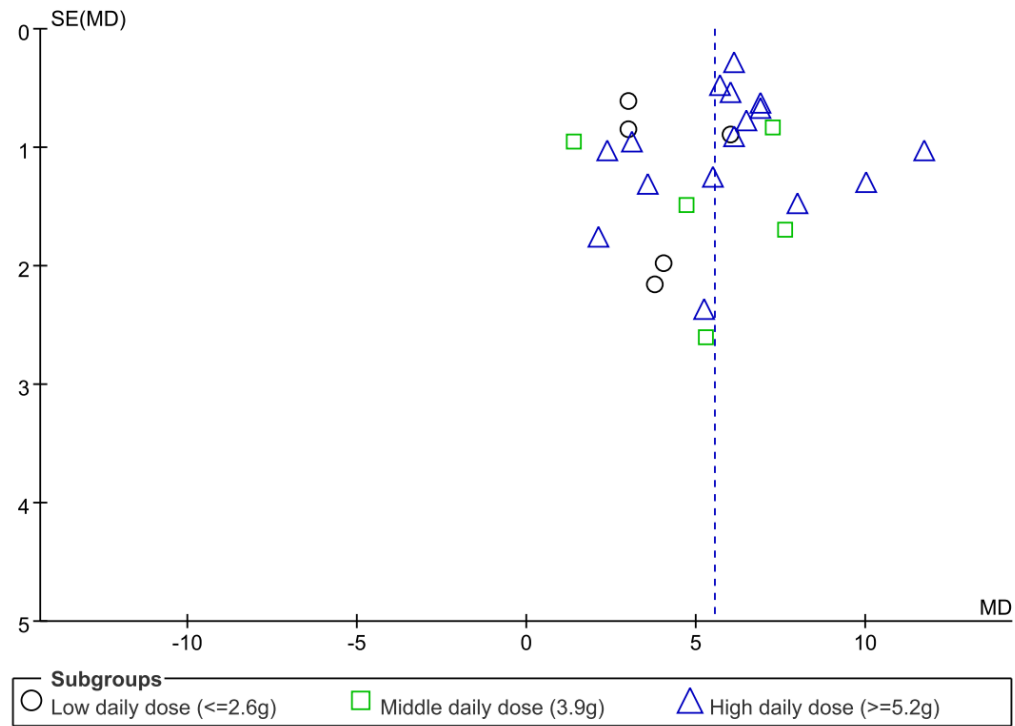

Figure S4. Publication bias funnel plots of the left ventricular ejection fraction.

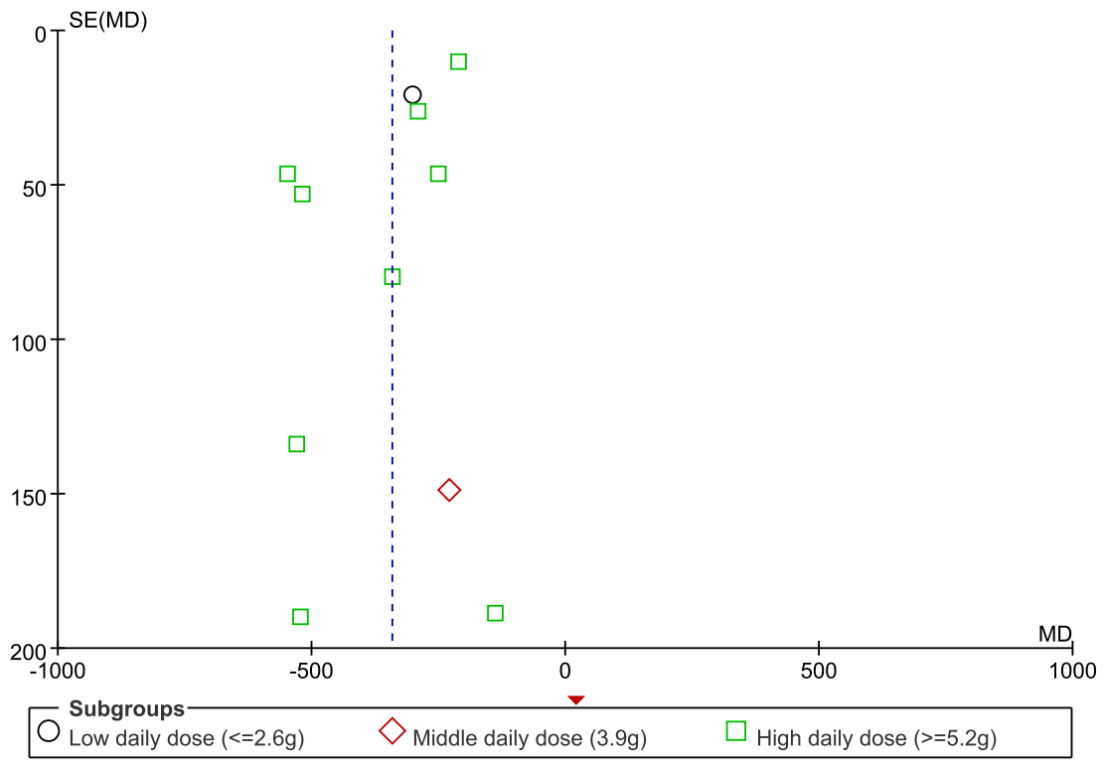

Figure S5. Publication bias funnel plots of N-terminal pro-brain natriuretic peptide.

Table S1. Results of the subgroup analysis stratified by the daily dose of Yiqi Fumai injection.

| Outcomes               | Number of studies | Low daily dose ( $\leq 2.6$ g) |                | Middle daily dose (3.9 g)  |                | High daily dose ( $\geq 5.2$ g) |                | Interaction P |
|------------------------|-------------------|--------------------------------|----------------|----------------------------|----------------|---------------------------------|----------------|---------------|
|                        |                   | OR/MD (95% CI)                 | I <sup>2</sup> | OR/MD (95% CI)             | I <sup>2</sup> | OR/MD (95% CI)                  | I <sup>2</sup> |               |
| Response to treatment  | 11                | 2.09 (1.33 to 3.29)            | 0%             | 2.34 (1.22 to 4.50)        | 0%             | 1.68 (1.20 to 2.35)             | 0%             | 0.57          |
| LVEF (%)               | 26                | 3.92 (2.56 to 5.28)            | 52%            | 5.18 (2.33 to 8.02)        | 83%            | 6.09 (5.20 to 6.98)             | 80%            | 0.03          |
| Cardiac output (L/min) | 6                 | 0.40 (-0.70 to 1.50)           | NA             | 0.37 (0.15 to 0.59)        | 77%            | 0.22 (0.03 to 0.41)             | 0%             | 0.60          |
| NT-proBNP (pg/ml)      | 14                | -301.00 (-342.28 to -259.72)   | NA             | -157.93 (-406.03 to 90.18) | 0%             | -369.06 (-469.49 to -268.64)    | 90%            | 0.23          |
| 6MWT (m)               | 6                 | 74.40 (13.47 to 135.33)        | NA             | 58.87 (35.41 to 82.33)     | NA             | 61.15 (38.09 to 84.20)          | 78%            | 0.90          |

Notes: OR = odds ratio; MD = mean difference; CI = confidence interval; LVEF = left ventricular ejection fraction; NT-proBNP = N-terminal pro-brain natriuretic peptide; NA = not applicable

Table S2. Results of the subgroup analysis stratified by the patients' average age.

| Outcomes               | Number of studies | <60 years                   |                | $\geq 60$ years              |                | Interaction P |
|------------------------|-------------------|-----------------------------|----------------|------------------------------|----------------|---------------|
|                        |                   | OR/MD (95% CI)              | I <sup>2</sup> | OR/MD (95% CI)               | I <sup>2</sup> |               |
| Response to treatment  | 11                | 1.97 (1.42 to 2.71)         | 0%             | 1.77 (1.19 to 2.62)          | 0%             | 0.68          |
| LVEF (%)               | 25                | 6.28 (4.29 to 8.26)         | 89%            | 5.20 (4.42 to 5.98)          | 73%            | 0.32          |
| Cardiac output (L/min) | 6                 | 0.51 (0.35 to 0.66)         | 0%             | 0.26 (0.19 to 0.33)          | 0%             | 0.003         |
| NT-proBNP (pg/ml)      | 14                | -232.03 (-374.96 to -89.09) | 99%            | -334.80 (-566.74 to -102.85) | 99%            | 0.46          |
| 6MWT (m)               | 6                 | 76.09 (56.27 to 95.91)      | 49%            | 49.72 (36.57 to 62.87)       | 0%             | 0.03          |

Notes: OR = odds ratio; MD = mean difference; CI = confidence interval; LVEF = left ventricular ejection fraction; NT-proBNP = N-terminal pro-brain natriuretic peptide; NA = not applicable

Table S3. Results of the subgroup analysis stratified by the level of risk of bias.

| Outcomes               | Number of studies | Moderate risk of bias       |                | High risk of bias            |                | Interaction P |
|------------------------|-------------------|-----------------------------|----------------|------------------------------|----------------|---------------|
|                        |                   | OR/MD (95% CI)              | I <sup>2</sup> | OR/MD (95% CI)               | I <sup>2</sup> |               |
| Response to treatment  | 11                | 1.87 (1.17 to 2.98)         | 0%             | 1.89 (1.41 to 2.54)          | 0%             | 0.96          |
| LVEF (%)               | 26                | 5.22 (4.36 to 6.09)         | 75%            | 5.98 (4.26 to 7.70)          | 88%            | 0.44          |
| Cardiac output (L/min) | 6                 | 0.36 (0.19 to 0.53)         | 31%            | 0.26 (0.19 to 0.33)          | NA             | 0.29          |
| NT-proBNP (pg/ml)      | 14                | -200.37 (-357.64 to -43.10) | 99%            | -307.60 (-470.93 to -144.27) | 97%            | 0.35          |
| 6MWT (m)               | 6                 | 83.90 (69.33 to 98.47)      | NA             | 52.56 (40.90 to 64.22)       | 64%            | 0.0010        |

Notes: OR = odds ratio; MD = mean difference; CI = confidence interval; LVEF = left ventricular ejection fraction; NT-proBNP = N-terminal pro-brain natriuretic peptide;

NA = not applicable
